# Supplementary material for: Quality of Work Life (QWL) and Its Impact on the Performance of the Banking Industry in Saudi Arabia
Source: MDPI journal article supplement (doi:10.3390/ijfs10030061), 2022-07-26
Supplement: s1 [file s1]

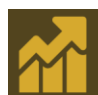

## Supplementary Materials

Quality of work life in Saudi banks and its impact on the banking sector's performance.

Personal Data

Age: Up to 25 years 26–35 years 36–50 years 50+

Gender: Male Female Married Children Single No children

Nationality: Saudi Non-Saudi

Marital Status: Single ☐ Married ☐ Widow ☐ Divorced ☐

Education: Under Grade 10 ☐ Grade 12 ☐ Graduation ☐ Master ☐ PhD ☐

|                                            |                   |                          |                                |                          |                            |                          |
|--------------------------------------------|-------------------|--------------------------|--------------------------------|--------------------------|----------------------------|--------------------------|
| Position (Please tick what applies to you) | Receptionist      | <input type="checkbox"/> | Business account manager       | <input type="checkbox"/> | Executive                  | <input type="checkbox"/> |
|                                            | Cashier           | <input type="checkbox"/> | Branch account manager         | <input type="checkbox"/> | Senior executive           | <input type="checkbox"/> |
|                                            | Customer Services | <input type="checkbox"/> | Regional office non- executive | <input type="checkbox"/> | Middle management position | <input type="checkbox"/> |
|                                            | On-line Banking   | <input type="checkbox"/> | Junior executive               | <input type="checkbox"/> | Board members/CEOs         | <input type="checkbox"/> |
| Phone Operator                             | Other             | <input type="checkbox"/> | <input type="checkbox"/>       | <input type="checkbox"/> | <input type="checkbox"/>   | <input type="checkbox"/> |

Your Monthly Income: <SAR5000 ☐ 5000–10,000 ☐ 10,001–15,000 ☐ 15,001–20,000 ☐ 20,000+ ☐

Your Main Bank: Saudi National Bank ☐ Multi-National in KSA ☐ Saudi / Foreign JV ☐ Saudi Islamic Bank ☐

Note. How far do you Agree/Disagree with the Following Statements on 5-Point Scale?

|                   |          |         |       |                |
|-------------------|----------|---------|-------|----------------|
| Strongly Disagree | Disagree | Neutral | Agree | Strongly Agree |
| 1                 | 2        | 3       | 4     | 5              |

### Physical Work Environment (PWE)

|    |                                                                                                    |   |   |   |   |   |
|----|----------------------------------------------------------------------------------------------------|---|---|---|---|---|
| 6  | Work environment of my bank is good and highly motivating                                          | 1 | 2 | 3 | 4 | 5 |
| 7  | Employees can take time off to take care of personal Matters                                       | 1 | 2 | 3 | 4 | 5 |
| 8  | My bank offers enough opportunities to enhance personal abilities                                  | 1 | 2 | 3 | 4 | 5 |
| 9  | The bank provides enough information to discharge responsibilities                                 | 1 | 2 | 3 | 4 | 5 |
| 10 | A lot of work empowerment is given to employees to decide about their work style and pace of work. | 1 | 2 | 3 | 4 | 5 |

| Banking Organization Culture (OC)        |                                                                                                                         |   |   |   |     |
|------------------------------------------|-------------------------------------------------------------------------------------------------------------------------|---|---|---|-----|
| 11                                       | There is cooperation among all the departments for achieving the goals.                                                 | 1 | 2 | 3 | 4 5 |
| 12                                       | I feel proud to work for my present bank                                                                                | 1 | 2 | 3 | 4 5 |
| 13                                       | The wage policies adopted by my bank are Good                                                                           | 1 | 2 | 3 | 4 5 |
| 14                                       | The bank communicates every new change that takes place.                                                                | 1 | 2 | 3 | 4 5 |
| Relation and Co-operation (RC)           |                                                                                                                         |   |   |   |     |
| 15                                       | I have harmonious relationship with my colleagues                                                                       | 1 | 2 | 3 | 4 5 |
| 16                                       | Employees have a strong sense of belongingness in my bank                                                               | 1 | 2 | 3 | 4 5 |
| 17                                       | The relationship between managers and employees are very good.                                                          | 1 | 2 | 3 | 4 5 |
| 18                                       | I get good support from my team members.                                                                                | 1 | 2 | 3 | 4 5 |
| Training and Development (TR)            |                                                                                                                         |   |   |   |     |
| 19                                       | Training programs in our bank help employees to achieve the required skill for performing the job effectively.          | 1 | 2 | 3 | 4 5 |
| 20                                       | The training programs aim at improving interpersonal relationship among employees                                       | 1 | 2 | 3 | 4 5 |
| 21                                       | My bank offers sufficient training opportunities to perform my job competently                                          | 1 | 2 | 3 | 4 5 |
| 22                                       | Training programs should be conducted frequently                                                                        | 1 | 2 | 3 | 4 5 |
| Compensation and Rewards (CR)            |                                                                                                                         |   |   |   |     |
| 23                                       | I feel that I am given an adequate and fair compensation for the work I do                                              | 1 | 2 | 3 | 4 5 |
| 24                                       | My bank pays salary by considering responsibilities at work                                                             | 1 | 2 | 3 | 4 5 |
| 25                                       | My bank links rewards to job performance                                                                                | 1 | 2 | 3 | 4 5 |
| 26                                       | Promotions are handled fairly.                                                                                          | 1 | 2 | 3 | 4 5 |
| 27                                       | When I do my job well, I am praised by my Superior                                                                      | 1 | 2 | 3 | 4 5 |
| Facilities (FAC)                         |                                                                                                                         |   |   |   |     |
| 28                                       | Fringe benefits provided are good                                                                                       | 1 | 2 | 3 | 4 5 |
| 29                                       | Bank provides social security benefits like Employee Provident Fund/Medical Reimbursement/ medical treatment and so on. | 1 | 2 | 3 | 4 5 |
| 30                                       | Good transportation facilities are provided by the bank                                                                 | 1 | 2 | 3 | 4 5 |
| 31                                       | Safety measures adopted by the bank are quite good                                                                      | 1 | 2 | 3 | 4 5 |
| 32                                       | Good welfare activities are provided by my bank                                                                         | 1 | 2 | 3 | 4 5 |
| Job Satisfaction and Security (JSS)      |                                                                                                                         |   |   |   |     |
| 33                                       | I feel quite secured about my job                                                                                       | 1 | 2 | 3 | 4 5 |
| 34                                       | Conditions on my job allow me to be as productive as I could                                                            | 1 | 2 | 3 | 4 5 |
| 35                                       | My earnings are fair when compared to the others doing the same type of work in other banks / companies.                | 1 | 2 | 3 | 4 5 |
| 36                                       | The procedure followed for job rotation is good.                                                                        | 1 | 2 | 3 | 4 5 |
| Autonomy of Work (AAW)                   |                                                                                                                         |   |   |   |     |
| 37                                       | I feel that my work allows me to do my best in a particular area.                                                       | 1 | 2 | 3 | 4 5 |
| 38                                       | My job lets me use my skills and abilities                                                                              | 1 | 2 | 3 | 4 5 |
| 39                                       | A part of my job is allowed to be done at home                                                                          | 1 | 2 | 3 | 4 5 |
| 40                                       | I am ready to take additional responsibilities with my job                                                              | 1 | 2 | 3 | 4 5 |
| Individual Work Performance (IWP)        |                                                                                                                         |   |   |   |     |
| i. Task performance                      |                                                                                                                         |   |   |   |     |
| 41                                       | While performing task I maintain quality of Work                                                                        | 1 | 2 | 3 | 4 5 |
| 42                                       | I always Plan and organize my work properly                                                                             | 1 | 2 | 3 | 4 5 |
| 43                                       | I perform tasks according to the required results                                                                       | 1 | 2 | 3 | 4 5 |
| 44                                       | I Prioritize and concentrate on tasks assigned to me                                                                    | 1 | 2 | 3 | 4 5 |
| 45                                       | I Work efficiently                                                                                                      | 1 | 2 | 3 | 4 5 |
| ii. Contextual performance—interpersonal |                                                                                                                         |   |   |   |     |

|                                                     |                                                         |   |   |   |   |   |
|-----------------------------------------------------|---------------------------------------------------------|---|---|---|---|---|
| 46                                                  | For performing the duties I always take initiative      | 1 | 2 | 3 | 4 | 5 |
| 47                                                  | I learn from feedback of my colleagues                  | 1 | 2 | 3 | 4 | 5 |
| 48                                                  | I extend full Cooperation to others                     | 1 | 2 | 3 | 4 | 5 |
| 49                                                  | I adequately express my ideas and intentions            | 1 | 2 | 3 | 4 | 5 |
| <b>iii. Contextual performance – organizational</b> |                                                         |   |   |   |   |   |
| 50                                                  | I Show responsibility while performing duties           | 1 | 2 | 3 | 4 | 5 |
| 51                                                  | I try to perform duties that are customer oriented.     | 1 | 2 | 3 | 4 | 5 |
| 52                                                  | I try to perform tasks in novel ways                    | 1 | 2 | 3 | 4 | 5 |
| 53                                                  | I try to take on work that is challenging in nature     | 1 | 2 | 3 | 4 | 5 |
| <b>iv. Adaptive performance</b>                     |                                                         |   |   |   |   |   |
| 54                                                  | I try to cope with stress and difficult situations.     | 1 | 2 | 3 | 4 | 5 |
| 55                                                  | I come up with creative solutions to difficult problems | 1 | 2 | 3 | 4 | 5 |
| 56                                                  | I Keep my job knowledge and skills up-to-date           | 1 | 2 | 3 | 4 | 5 |
| 57                                                  | I adjust work goals when necessary                      | 1 | 2 | 3 | 4 | 5 |
| <b>v. Counterproductive work behavior</b>           |                                                         |   |   |   |   |   |
| 58                                                  | I try to make problems bigger than they really are      | 1 | 2 | 3 | 4 | 5 |
| 59                                                  | I do things that harm my organization                   | 1 | 2 | 3 | 4 | 5 |
| 60                                                  | I leave work for others to finish                       | 1 | 2 | 3 | 4 | 5 |
| 61                                                  | I purposely make mistakes                               | 1 | 2 | 3 | 4 | 5 |

(Walton 1973) Walton, Richard E. 1973. Quality of Work Life, What Is It? *Sloan Management Review Journal* 15: 11–21.

(Woods 1993) Woods, Robert C. 1993. Managing to meet employee expectations: Quality improvement tools narrow the gap between employee expectations and company resource. *Human Resource Planning* 16: 13–28.
